# Supplementary material for: Effect of Moringa oleifera seeds on the removal of pathogens and pharmaceutical residues in a domestic wastewater treatment plant by an interdisciplinary approach
Source: PubMed Central journal article supplement — Environ Sci Pollut Res Int. 2024 Nov 21;31(56):65123–36. doi: 10.1007/s11356-024-35362-8 (PMC11624239; doi:10.1007/s11356-024-35362-8), 2024-11-21
Supplement: 11356_2024_35362_MOESM1_ESM.pdf [file 11356_2024_35362_MOESM1_ESM.pdf]

1 *Supplementary Information*

2 **Table A** Pilot WWTP physico-chemical parameters 2018

| Tank | Temperature (°C) | pH  | Suspended Solids (mg/L) | BOD <sub>5</sub> (mg/L) | COD (mgO <sub>2</sub> /L) |
|------|------------------|-----|-------------------------|-------------------------|---------------------------|
| F0   | 29.2             | 7.0 | 618                     | 646                     | 936                       |
| F1   | 28.0             | 7.2 | 273                     | 272                     | 480                       |
| F2   | 30.7             | 7.6 | 45                      | 78                      | 264                       |

3

4 **Table B** Physico-chemical parameters of WWTP 2022

| Tank | Moringa oleifera seeds (MOS) | Suspended Solids (mg/L) | BOD <sub>5</sub> (mg/L) | COD (mgO <sub>2</sub> /L) | Total Nitrogen (mgN/L) | Phosphorus (mg PO <sub>4</sub> <sup>3-</sup> /L) | Temperature (°C) | pH  | Conductivity (µS/cm) | DO (mg/L) |
|------|------------------------------|-------------------------|-------------------------|---------------------------|------------------------|--------------------------------------------------|------------------|-----|----------------------|-----------|
| F0   | without MOS                  | 306                     | 362                     | 480                       | 19                     | 20.8                                             | 28.7             | 6.7 | 1202                 | 0.12      |
| F1   | without MOS                  | 296                     | 240                     | 330                       | 38                     | 20.2                                             | 28.9             | 7.0 | 1190                 | 0.21      |
| F2   | without MOS                  | 45                      | 48                      | 520                       | 58                     | 18                                               | 29.55            | 7.4 | 1104                 | 0.20      |
| F0   | with MOS                     | 204                     | 474                     | 320                       | 52                     | 19.3                                             | 28.85            | 6.8 | 1252                 | 0.13      |
| F1   | with MOS                     | 112                     | 217                     | 575                       | 60                     | 19.8                                             | 29.05            | 7.0 | 1222                 | 0.15      |
| F2   | with MOS                     | 51                      | 62                      | 740                       | 28                     | 19.2                                             | 31.5             | 7.4 | 1154                 | 0.15      |

5

6 **Table C** Physico-chemical limits of treated wastewaters set by the Senegalese rejection  
7 standard NS 05-061

| Temperature (°C) | pH      | Suspended Solids (mg/L) | BOD <sub>5</sub> (mg/L) | COD (mgO <sub>2</sub> /L) | Total Nitrogen (mgN/L) | Phosphorus (mgPO <sub>4</sub> <sup>3-</sup> /L) |
|------------------|---------|-------------------------|-------------------------|---------------------------|------------------------|-------------------------------------------------|
| 25-35            | 5,5-9,5 | 50                      | 80                      | 200                       | 30                     | 10                                              |

8

9 **Table D 2020 and 2022 microbiology campaigns done on the WWTP pilot**

| Tank | Moringa oleifera seeds (MOS) | Ampicillin (AMP) | E. coli (cfu/mL) |          | Feacal coliform (cfu/mL) |          | Vibrio cholerae (cfu/mL) |          | Enterococcus spp (cfu/mL) |          | Total flora (cfu/mL) |              |
|------|------------------------------|------------------|------------------|----------|--------------------------|----------|--------------------------|----------|---------------------------|----------|----------------------|--------------|
|      |                              |                  | 2020             | 2022     | 2020                     | 2022     | 2020                     | 2022     | 2020                      | 2022     | 2020                 | 2022         |
| F0   | Without                      | Without          | 1.97E+04         | 5.25E+04 | 2.13E+04                 | 6.28E+05 | 3.30E+03                 | 1.00E+07 | LQ                        | 1.08E+03 | 2.63E+07             | 1.73E+10     |
| F1   | Without                      | Without          | 5.00E+04         | 1.80E+04 | 1.55E+04                 | 3.42E+05 | 1.35E+03                 | 2.38E+08 | LQ                        | 4.50E+02 | 1.58E+08             | 1.53E+08     |
| F2   | Without                      | Without          | 2.73E+02         | 2.00E+03 | 2.97E+02                 | 2.50E+04 | 2.17E+01                 | 4.34E+03 | LQ                        | 1.67E+01 | 2.65E+06             | 1.73E+10     |
| F0   | With                         | Without          | 5.47E+03         | 6.58E+04 | 3.77E+03                 | 4.53E+05 | 1.12E+03                 | 9.05E+02 | LQ                        | 4.33E+02 | 7.00E+06             | 1.20E+08     |
| F1   | with                         | Without          | 1.06E+04         | 1.77E+05 | 1.11E+04                 | 1.74E+05 | 5.90E+01                 | 1.25E+03 | LQ                        | 6.67E+01 | 1.20E+07             | 3.33E+06     |
| F2   | with                         | Without          | 1.73E+02         | 4.33E+03 | 4.57E+01                 | 5.32E+03 | 1.40E+01                 | 1.12E+02 | LQ                        | 1.33E+02 | 1.80E+06             | 8.33E+06     |
| F0   | Without                      | with             | 1.49E+04         | 6.43E+05 | 1.41E+04                 | 6.69E+07 | 4.30E+02                 | 0.00E+00 | LQ                        | 0.00E+00 | 1.92E+06             | ><br>300E+06 |
| F1   | Without                      | with             | 1.25E+04         | 8.22E+05 | 1.30E+04                 | 1.63E+05 | 1.47E+01                 | 2.00E+03 | LQ                        | 0.00E+00 | 1.80E+07             | ><br>300E+06 |
| F2   | Without                      | with             | 2.03E+02         | 4.10E+05 | 1.70E+02                 | 1.98E+05 | 4.67E+00                 | 0.00E+00 | LQ                        | 0.00E+00 | 6.83E+05             | 3.33E+06     |
| F0   | With                         | with             | 1.23E+03         | 3.62E+05 | 1.10E+03                 | 1.17E+05 | 2.20E+02                 | 2.93E+05 | LQ                        | 0.00E+00 | 1.34E+06             | 1.67E+08     |
| F1   | with                         | with             | 3.23E+03         | 8.78E+05 | 2.67E+02                 | 1.02E+06 | 1.33E+01                 | 1.00E+06 | LQ                        | 0.00E+00 | 1.45E+06             | ><br>300E+06 |
| F2   | with                         | with             | 6.00E+00         | 1.19E+04 | 1.03E+01                 | 1.75E+05 | 0.00E+00                 | 4.50E+04 | LQ                        | 0.00E+00 | 6.40E+05             | 1.33E+07     |

10 LQ = limit of quantification

11
